# Supplementary material for: Preliminary Research on the Effect of Hyperbaric Oxygen Therapy in Patients with Post-COVID-19 Syndrome
Source: MDPI journal article supplement (doi:10.3390/jcm12010308), 2022-12-30
Supplement: s1 [file s1]

### Supplement 3. Fullerton test results in patients tested during the HBO therapy.

|                                               | Before HBO<br>compression | After 5 HBO sessions | After 10 HBO sessions | After 15 HBO sessions |
|-----------------------------------------------|---------------------------|----------------------|-----------------------|-----------------------|
| Getting up from a chair<br>in 30 seconds:     |                           |                      |                       |                       |
| - Mean                                        | 13.9 ± 4.3                | 16.1 ± 5.1           | 17.3 ± 5              | 18.5 ± 4.9            |
| - Min.                                        | 5                         | 6                    | 7                     | 9                     |
| - Max.                                        | 25                        | 28                   | 31                    | 33                    |
| - Mode                                        | 11                        | 16                   | 19                    | 19                    |
| 8 Foot Test - Stand Up<br>and Walk (seconds): |                           |                      |                       |                       |
| - Mean                                        | 6.7 ± 2.5                 | 6.1 ± 2.8            | 5.9 ± 2.5             | 5.5 ± 1.9             |
| - Min.                                        | 4.4                       | 3.9                  | 3.8                   | 3.8                   |
| - Max.                                        | 16                        | 18                   | 16.5                  | 13.3                  |
| - Mode                                        | 4.9                       | 5.8                  | 4.3                   | 3.8                   |
| Two minute step test                          |                           |                      |                       |                       |
| - Mean                                        | 92.2 ± 31.8               | 107.5 ± 31.3         | 113.7 ± 31.6          | 126 ± 38.7            |
| - Min.                                        | 32                        | 40                   | 52                    | 56                    |
| - Max.                                        | 150                       | 163                  | 177                   | 252                   |
| - Mode                                        | 68                        | 103                  | 75                    | 91                    |
| Dynamometric test (N):                        |                           |                      |                       |                       |
| - Left hand:                                  |                           |                      |                       |                       |
| - Mean                                        | 28.4 ± 11.9               | 29.9 ± 12.6          | 30.1 ± 13             | 32.7 ± 13.5           |
| - Min.                                        | 3.75                      | 4                    | 4                     | 4                     |
| - Max.                                        | 49                        | 51                   | 52                    | 68                    |
| - Mode                                        | 21                        | 32                   | 44                    | 24                    |
| - Right hand:                                 |                           |                      |                       |                       |
| - Mean                                        | 29.4 ± 11.5               | 30.1 ± 12.1          | 32.3 ± 12.1           | 33.3 ± 12.9           |
| - Min.                                        | 6.25                      | 4                    | 2                     | 4                     |
| - Max.                                        | 55                        | 53                   | 54                    | 65                    |
| - Mode                                        | 22                        | 22                   | 38                    | 36                    |
| Back scratch test (cm):                       |                           |                      |                       |                       |
| - Mean                                        | -9.6 ± 12.9               | -9.4 ± 11.7          | -8.5 ± 11.7           | -8.6 ± 9.7            |
| - Min.                                        | -29                       | -26                  | -25.50                | -25.5                 |
| - Max.                                        | 37.5                      | 26                   | 30                    | 7                     |
| - Mode                                        | -7                        | -24                  | -11.5                 | -10                   |
| Try to sit down and reach<br>(cm):            |                           |                      |                       |                       |
| - Mean                                        | 4 ± 7.2                   | 6 ± 7.3              | 6.1 ± 8.1             | 8 ± 7.6               |
| - Min.                                        | -10                       | -7                   | -11                   | -7                    |
| - Max.                                        | 21                        | 20                   | 21                    | 20                    |
| - Mode                                        | 0                         | 3                    | 0                     | 0                     |
