# Supplementary material for: Preliminary Research on the Effect of Hyperbaric Oxygen Therapy in Patients with Post-COVID-19 Syndrome
Source: MDPI journal article supplement (doi:10.3390/jcm12010308), 2022-12-30
Supplement: s1 [file s1]

**Supplement 1.** The results of pulse oximetry in patients undergoing a series of HBO compressions.

|                                                                                        | Before HBO compression         |                               | After 5 HBO sessions           |                               | After 10 HBO sessions          |                               | After 15 HBO sessions          |                               |
|----------------------------------------------------------------------------------------|--------------------------------|-------------------------------|--------------------------------|-------------------------------|--------------------------------|-------------------------------|--------------------------------|-------------------------------|
|                                                                                        | Before the ef<br>fort/exercise | After the ef<br>fort/exercise |
| Saturation:                                                                            |                                |                               |                                |                               |                                |                               |                                |                               |
| - Mean                                                                                 | 96.8 ± 1.9                     | 94.8 ± 5.4                    | 97.1 ± 1.9                     | 95.7 ± 2.2                    | 97.1 ± 1.7                     | 96.2 ± 2.2                    | 97.2 ± 1.7                     | 96.8 ± 2.2                    |
| - Minimal                                                                              | 93                             | 70                            | 91                             | 90                            | 92                             | 89                            | 92                             | 90                            |
| Mean difference<br>between post-<br>exercise and pre-<br>exercise oxygen<br>saturation | -2.03                          |                               | -1.39                          |                               | -0.97                          |                               | -0.35                          |                               |
| Pulse:                                                                                 |                                |                               |                                |                               |                                |                               |                                |                               |
| - Average                                                                              | 75.3 ± 12                      | 92.8 ± 18.4                   | 71.4 ± 10.4                    | 94 ± 16.7                     | 71.3 ± 10                      | 90.9 ± 17.2                   | 70.2 ± 11.2                    | 92.3 ± 16.9                   |
| - Min.                                                                                 | 55                             | 31                            | 52                             | 65                            | 54                             | 64                            | 50                             | 61                            |
| - Max.                                                                                 | 100                            | 124                           | 88                             | 123                           | 89                             | 126                           | 96                             | 122                           |
| - mode                                                                                 | 76                             | 90                            | 87                             | 104                           | 74                             | 86                            | 75                             | 105                           |
| Average<br>difference<br>between post-<br>exercise and pre-<br>exercise heart rate     | 17.5 ± 6.4                     |                               | 22.6 ± 6.3                     |                               | 19.7 ± 7.2                     |                               | 22.1 ± 5.7                     |                               |
