# Supplementary material for: Preliminary Research on the Effect of Hyperbaric Oxygen Therapy in Patients with Post-COVID-19 Syndrome
Source: MDPI journal article supplement (doi:10.3390/jcm12010308), 2022-12-30
Supplement: s1 [file s1]

**Supplement 4.** The results of venous blood gasometry in patients subjected to the test in the subsequent phases of the experiment (before the start of the experiment, after 5, after 10 and after 15 compressions).

|                  | Before HBO<br>compression | After 5 HBO sessions | After 10 HBO sessions | After 15 HBO sessions |
|------------------|---------------------------|----------------------|-----------------------|-----------------------|
| pCO <sub>2</sub> |                           |                      |                       |                       |
| - Mean           | 47.8 ± 5.1                | 51.2 ± 5.7           | 50.7 ± 7.2            | 66.6 ± 8.7            |
| - Min.           | 37                        | 42.4                 | 38.2                  | 22.5                  |
| - Max.           | 56.6                      | 62.3                 | 66.2                  | 68.8                  |
| pO <sub>2</sub>  |                           |                      |                       |                       |
| - Mean           | 31 ± 10                   | 25.65 ± 7.2          | 28.05 ± 11.6          | 28.6 ± 8.6            |
| - Min.           | 20.2                      | 14.6                 | 18                    | 18.6                  |
| - Max.           | 62.6                      | 44.8                 | 73.8                  | 60.3                  |
| cBASE            |                           |                      |                       |                       |
| - Mean           | -3.34 ± 5.4               | -2.74 ± 5.6          | -2.6 ± 5.8            | -3.43 ± 5.3           |
| - Min.           | -11                       | -10                  | -12                   | -16.6                 |
| - Max            | 5.1                       | 7.7                  | 7.8                   | 5.4                   |
| pH               |                           |                      |                       |                       |
| - Mean           | 7.28 ± 0.1                | 7.27 ± 0.07          | 7.28 ± 0.07           | 7.27 ± 0.05           |
| - Min.           | 7.14                      | 7.15                 | 7.13                  | 7.16                  |
| - Max            | 7.4                       | 7.42                 | 7.44                  | 7.36                  |
| Anion gap:       |                           |                      |                       |                       |
| - Mean           | 13.5 ± 4.2                | 12.7 ± 4.8           | 11.7 ± 4.2            | 12.6 ± 4.4            |
| - Min.           | 6.4                       | 5.2                  | 5.2                   | 2.7                   |
| - Max            | 18.7                      | 23.4                 | 17.9                  | 18.8                  |
| Lactates         |                           |                      |                       |                       |
| - Mean           | 1.35 ± 0.47               | 1.15 ± 0.41          | 1.11 ± 0.48           | 1.06 ± 0.4            |
| - Min.           | 0.6                       | 0.3                  | 0.4                   | 0.5                   |
| - Max            | 2.5                       | 2.3                  | 2.3                   | 1.8                   |
| Glucose:         |                           |                      |                       |                       |
| - Mean           | 124 ± 42                  | 117.8 ± 28.7         | 115.7 ± 30.5          | 112 ± 8.8             |
| - Min.           | 90                        | 90                   | 82                    | 87                    |
| - Max            | 287                       | 215                  | 242                   | 169                   |
